# Supplementary material for: Alleviation of endoplasmic reticulum stress protects against cisplatin-induced ovarian damage
Source: PubMed Central journal article supplement (PMC6122480; doi:10.1186/s12958-018-0404-4), 2018-09-03
Supplement: 12958_2018_404_MOESM1_ESM.pdf [file 12958_2018_404_MOESM1_ESM.pdf]

## Additional Figure 1

A STRING analysis shows signaling network.

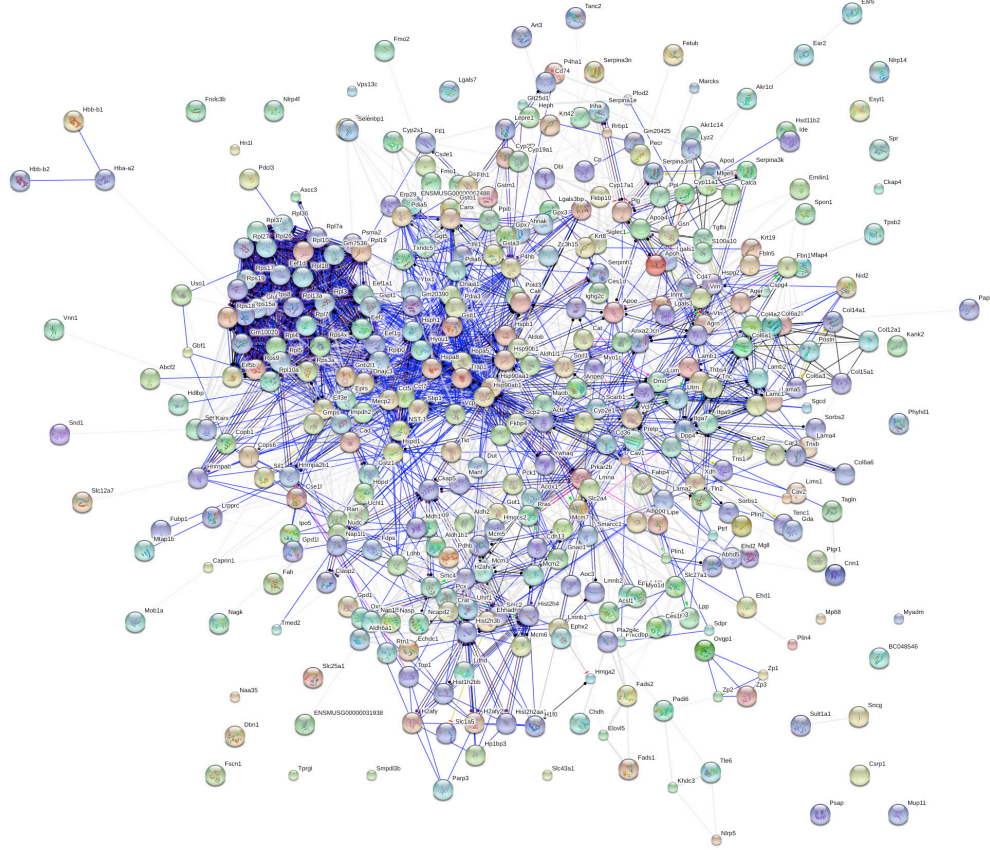

**Additional Figure 2**

The protein levels of FADS2 and HSD11B2 by western blotting.

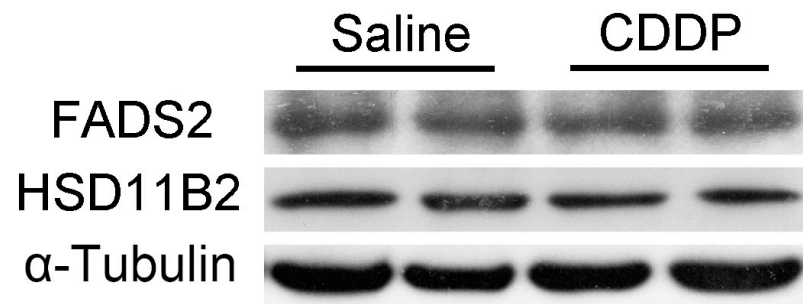

### Additional Figure 3

Full-length western blot images with negative controls

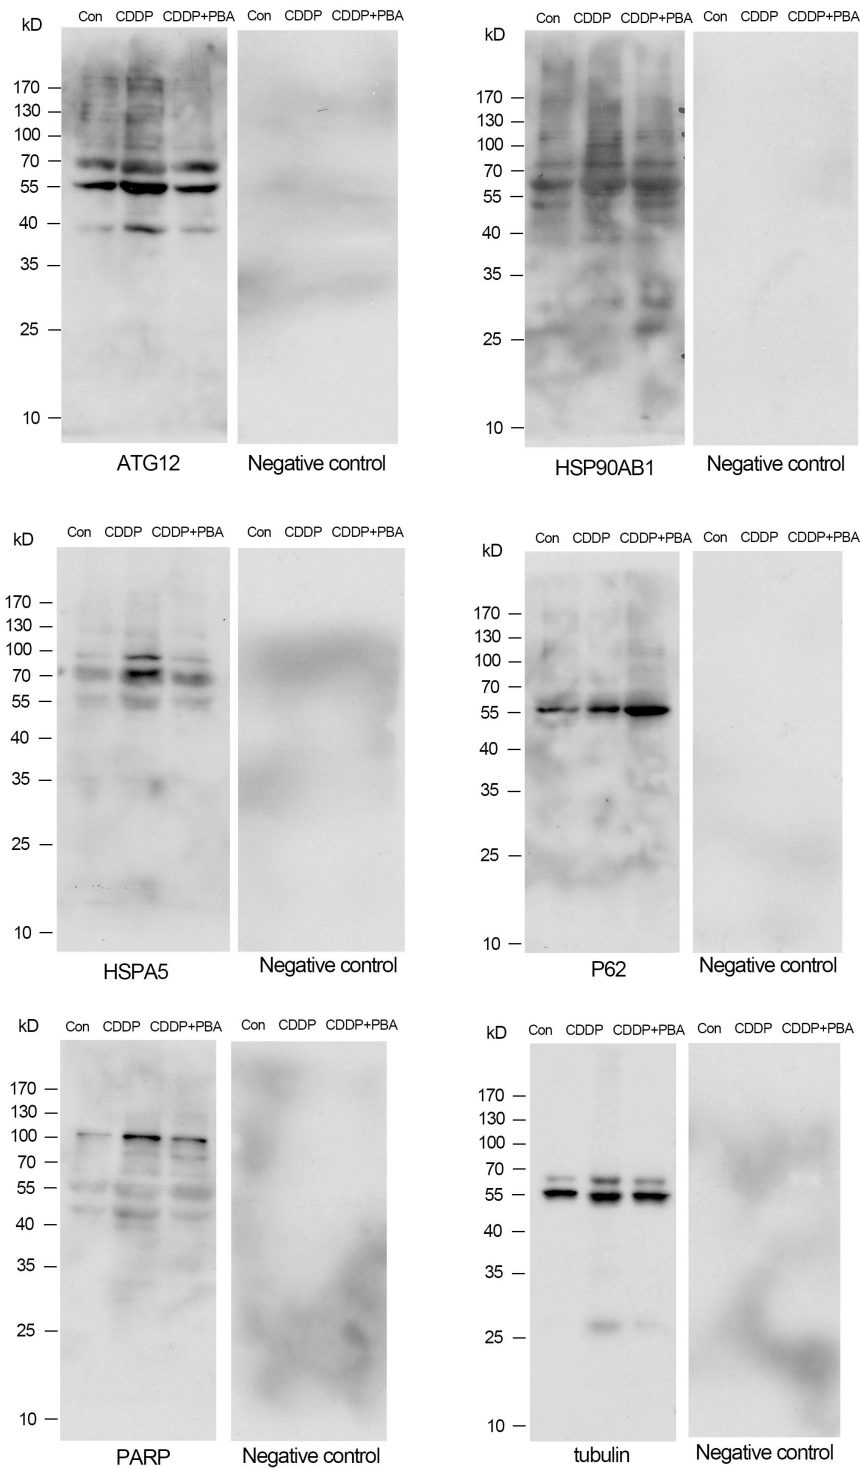

**Additional file : Table 1**

Antibodies used for different experiments in this study.

| Antibody                      | Vendor                    | Catalog number | Application | Working dilution for WB or (IF) |
|-------------------------------|---------------------------|----------------|-------------|---------------------------------|
| Rabbit anti-HSPA5             | ABclonal                  | A11366         | WB, IF      | 1:1000, (1:100)                 |
| Rabbit anti-HSP90AB1          | Zen Bioscience            | 616474         | WB, IF      | 1:1000, (1:100)                 |
| Rabbit anti-P62               | Zen Bioscience            | 380612         | WB          | 1:1000                          |
| Rabbit anti-PARP              | Cell Signaling Technology | #9532          | WB          | 1:1000                          |
| Rabbit anti-ATG12             | Bioworld                  | AP0758         | WB          | 1:2000                          |
| Mouse anti- $\alpha$ -Tubulin | Sungenen                  | KM9007         | WB          | 1:5000                          |

WB, western blot; IF, immunofluorescence.

## Additional file : Table 2

### down-regulated 1.5-fold proteins

| N  | Citable Accession | Name                                                                                               | Gene Name    | Fold Change |
|----|-------------------|----------------------------------------------------------------------------------------------------|--------------|-------------|
| 1  | Q9Z0R9            | Fatty acid desaturase 2 OS=Mus musculus GN=Fads2 PE=1 SV=1                                         | GN=Fads2     | 10.15       |
| 2  | Q61009            | Scavenger receptor class B member 1 OS=Mus musculus GN=Scarb1 PE=1 SV=1                            | GN=Scarb1    | 8.05        |
| 3  | Q62151            | Advanced glycosylation end product-specific receptor OS=Mus musculus GN=Ager PE=1 SV=2             | GN=Ager      | 4.20        |
| 4  | Q9JKR6            | Hypoxia up-regulated protein 1 OS=Mus musculus GN=Hyou1 PE=1 SV=1                                  | GN=Hyou1     | 3.62        |
| 5  | P27786            | Steroid 17-alpha-hydroxylase/17,20 lyase OS=Mus musculus GN=Cyp17a1 PE=1 SV=1                      | GN=Cyp17a1   | 3.32        |
| 6  | P02089            | Hemoglobin subunit beta-2 OS=Mus musculus GN=Hbb-b2 PE=1 SV=2                                      | GN=Hbb-b2    | 3.16        |
| 7  | P97425            | Eosinophil cationic protein 2 OS=Mus musculus GN=Ear2 PE=2 SV=1                                    | GN=Ear2      | 2.99        |
| 8  | P97351            | 40S ribosomal protein S3a OS=Mus musculus GN=Rps3a PE=1 SV=3                                       | GN=Rps3a     | 2.98        |
| 9  | P31324            | cAMP-dependent protein kinase type II-beta regulatory subunit OS=Mus musculus GN=Prkar2b PE=1 SV=3 | GN=Prkar2b   | 2.87        |
| 10 | P19324            | Serpin H1 OS=Mus musculus GN=Serpinh1 PE=1 SV=3                                                    | GN=Serpinh1  | 2.73        |
| 11 | E9Q718            | Procollagen-lysine,2-oxoglutarate 5-dioxygenase 2 OS=Mus musculus GN=Plod2 PE=1 SV=1               | GN=Plod2     | 2.57        |
| 12 | Q9Z1T2            | Thrombospondin-4 OS=Mus musculus GN=Thbs4 PE=1 SV=1                                                | GN=Thbs4     | 2.52        |
| 13 | P20029            | 78 kDa glucose-regulated protein OS=Mus musculus GN=Hspa5 PE=1 SV=3                                | GN=Hspa5     | 2.48        |
| 14 | P51661            | Corticosteroid 11-beta-dehydrogenase isozyme 2 OS=Mus musculus GN=Hsd11b2 PE=1 SV=2                | GN=Hsd11b2   | 2.46        |
| 15 | E9Q0U7            | Heat shock protein 105 kDa OS=Mus musculus GN=Hsph1 PE=1 SV=1                                      | GN=Hsph1     | 2.42        |
| 16 | Q920L1            | Fatty acid desaturase 1 OS=Mus musculus GN=Fads1 PE=1 SV=1                                         | GN=Fads1     | 2.39        |
| 17 | P09103            | Protein disulfide-isomerase OS=Mus musculus GN=P4hb PE=1 SV=2                                      | GN=P4hb      | 2.36        |
| 18 | Q62010            | Oviduct-specific glycoprotein OS=Mus musculus GN=Ovgp1 PE=2 SV=1                                   | GN=Ovgp1     | 2.36        |
| 19 | Q9DBS2            | Tumor protein p63-regulated gene 1-like protein OS=Mus musculus GN=Tprg11 PE=1 SV=1                | GN=Tprg11    | 2.35        |
| 20 | P11499            | Heat shock protein HSP 90-beta OS=Mus musculus GN=Hsp90ab1 PE=1 SV=3                               | GN=Hsp90ab1  | 2.33        |
| 21 | P63037            | Dnaj homolog subfamily A member 1 OS=Mus musculus GN=Dnaja1 PE=1 SV=1                              | GN=Dnaja1    | 2.32        |
| 22 | Q4FZE8            | Major urinary protein 1 OS=Mus musculus GN=Mup1 PE=1 SV=1                                          | GN=Mup1      | 2.29        |
| 23 | A0A1D5RM85        | 60S ribosomal protein L18a (Fragment) OS=Mus musculus GN=Rpl18a PE=4 SV=1                          | GN=Rpl18a    | 2.27        |
| 24 | Q3UU35            | Ovostatin homolog OS=Mus musculus GN=Ovos PE=2 SV=2                                                | GN=Ovos      | 2.26        |
| 25 | Q9QZ82            | Cholesterol side-chain cleavage enzyme, mitochondrial OS=Mus musculus GN=Cyp11a1 PE=1 SV=1         | GN=Cyp11a1   | 2.24        |
| 26 | Q8K2Z4            | Condensin complex subunit 1 OS=Mus musculus GN=Ncapd2 PE=1 SV=2                                    | GN=Ncapd2    | 2.24        |
| 27 | Q920E5            | Farnesyl pyrophosphate synthase OS=Mus musculus GN=Fdps PE=1 SV=1                                  | GN=Fdps      | 2.17        |
| 28 | P27659            | 60S ribosomal protein L3 OS=Mus musculus GN=Rpl3 PE=1 SV=3                                         | GN=Rpl3      | 2.15        |
| 29 | Q00898            | Alpha-1-antitrypsin 1-5 OS=Mus musculus GN=Serpina1e PE=1 SV=1                                     | GN=Serpina1e | 2.12        |
| 30 | F6VW30            | 14-3-3 protein theta (Fragment) OS=Mus musculus GN=Ywhaq PE=1 SV=1                                 | GN=Ywhaq     | 2.12        |

|    |            |                                                                                                        |              |      |
|----|------------|--------------------------------------------------------------------------------------------------------|--------------|------|
| 31 | E9QAZ2     | Ribosomal protein L15 OS=Mus musculus GN=Gm10020 PE=3 SV=1                                             | GN=Gm10020   | 2.11 |
| 32 | P10126     | Elongation factor 1-alpha 1 OS=Mus musculus GN=Eef1a1 PE=1 SV=3                                        | GN=Eef1a1    | 2.11 |
| 33 | A0A0A0MQA3 | Alpha-1-antitrypsin 1-1 OS=Mus musculus GN=Serpina1a PE=1 SV=1                                         | GN=Serpina1a | 2.06 |
| 34 | P62960     | Nuclease-sensitive element-binding protein 1 OS=Mus musculus GN=Ybx1 PE=1 SV=3                         | GN=Ybx1      | 2.04 |
| 35 | Q6NWW9     | Fibronectin type III domain-containing protein 3B OS=Mus musculus GN=Fndc3b PE=1 SV=1                  | GN=Fndc3b    | 2.02 |
| 36 | Q80ZP8     | Armet protein OS=Mus musculus GN=Manf PE=1 SV=1                                                        | GN=Manf      | 2.02 |
| 37 | Q3ULG5     | DNA helicase OS=Mus musculus GN=Mcm6 PE=1 SV=1                                                         | GN=Mcm6      | 2.00 |
| 38 | G3X8X6     | Sialic acid binding Ig-like lectin 1, sialoadhesin, isoform CRA_b OS=Mus musculus GN=Siglec1 PE=1 SV=1 | GN=Siglec1   | 1.99 |
| 39 | A0A075B5P2 | Protein Igkc (Fragment) OS=Mus musculus GN=Igkc PE=1 SV=1                                              | GN=Igkc      | 1.98 |
| 40 | B2RQC6     | CAD protein OS=Mus musculus GN=Cad PE=1 SV=1                                                           | GN=Cad       | 1.97 |
| 41 | P35980     | 60S ribosomal protein L18 OS=Mus musculus GN=Rpl18 PE=1 SV=3                                           | GN=Rpl18     | 1.96 |
| 42 | P62245     | 40S ribosomal protein S15a OS=Mus musculus GN=Rps15a PE=1 SV=2                                         | GN=Rps15a    | 1.95 |
| 43 | P68040     | Receptor of activated protein C kinase 1 OS=Mus musculus GN=Rack1 PE=1 SV=3                            | GN=Rack1     | 1.95 |
| 44 | Q04997     | Inhibin alpha chain OS=Mus musculus GN=Inha PE=1 SV=2                                                  | GN=Inha      | 1.95 |
| 45 | Q99LJ6     | Glutathione peroxidase 7 OS=Mus musculus GN=Gpx7 PE=1 SV=1                                             | GN=Gpx7      | 1.94 |
| 46 | Q9JJF0     | Nucleosome assembly protein 1-like 5 OS=Mus musculus GN=Nap115 PE=1 SV=1                               | GN=Nap115    | 1.93 |
| 47 | Q9D8E6     | 60S ribosomal protein L4 OS=Mus musculus GN=Rpl4 PE=1 SV=3                                             | GN=Rpl4      | 1.93 |
| 48 | A0A140T8V5 | Proliferating cell nuclear antigen OS=Mus musculus GN=Pcna-ps2 PE=3 SV=1                               | GN=Pcna-ps2  | 1.92 |
| 49 | Q8BKCS     | Importin-5 OS=Mus musculus GN=Ipo5 PE=1 SV=3                                                           | GN=Ipo5      | 1.91 |
| 50 | P63276     | 40S ribosomal protein S17 OS=Mus musculus GN=Rps17 PE=1 SV=2                                           | GN=Rps17     | 1.90 |
| 51 | P08113     | Endoplasmic reticulum chaperone protein OS=Mus musculus GN=Hsp90b1 PE=1 SV=2                           | GN=Hsp90b1   | 1.89 |
| 52 | P47962     | 60S ribosomal protein L5 OS=Mus musculus GN=Rpl5 PE=1 SV=3                                             | GN=Rpl5      | 1.89 |
| 53 | P97926     | Oxytocin receptor OS=Mus musculus GN=Oxtr PE=2 SV=2                                                    | GN=Oxtr      | 1.89 |
| 54 | A2A690     | Protein TANC2 OS=Mus musculus GN=Tanc2 PE=1 SV=1                                                       | GN=Tanc2     | 1.89 |
| 55 | Q921X9     | Protein disulfide-isomerase A5 OS=Mus musculus GN=Pdia5 PE=1 SV=1                                      | GN=Pdia5     | 1.89 |
| 56 | Q9Z0Z4     | Hephaestin OS=Mus musculus GN=Heph PE=1 SV=3                                                           | GN=Heph      | 1.89 |
| 57 | I7HLV2     | 60S ribosomal protein L10 (Fragment) OS=Mus musculus GN=Rpl10 PE=1 SV=1                                | GN=Rpl10     | 1.88 |
| 58 | P25206     | DNA replication licensing factor MCM3 OS=Mus musculus GN=Mcm3 PE=1 SV=2                                | GN=Mcm3      | 1.88 |
| 59 | A6PW84     | Prolyl 3-hydroxylase 1 OS=Mus musculus GN=P3h1 PE=1 SV=1                                               | GN=P3h1      | 1.87 |
| 60 | Q52KC3     | DNA helicase OS=Mus musculus GN=Mcm5 PE=1 SV=1                                                         | GN=Mcm5      | 1.86 |
| 61 | Q91W90     | Thioredoxin domain-containing protein 5 OS=Mus musculus GN=Txndc5 PE=1 SV=2                            | GN=Txndc5    | 1.86 |
| 62 | P14211     | Calreticulin OS=Mus musculus GN=Calr PE=1 SV=1                                                         | GN=Calr      | 1.85 |
| 63 | P57759     | Endoplasmic reticulum resident protein 29 OS=Mus musculus GN=Erp29 PE=1 SV=2                           | GN=Erp29     | 1.85 |

|    |            |                                                                                               |              |      |
|----|------------|-----------------------------------------------------------------------------------------------|--------------|------|
| 64 | P80316     | T-complex protein 1 subunit epsilon OS=Mus musculus GN=Cct5 PE=1 SV=1                         | GN=Cct5      | 1.85 |
| 65 | Q99PL5     | Ribosome-binding protein 1 OS=Mus musculus GN=Rrbp1 PE=1 SV=2                                 | GN=Rrbp1     | 1.84 |
| 66 | P26645     | Myristoylated alanine-rich C-kinase substrate OS=Mus musculus GN=Marcks PE=1 SV=2             | GN=Marcks    | 1.84 |
| 67 | Q6DFZ1     | Golgi-specific brefeldin A-resistance factor 1 OS=Mus musculus GN=Gbf1 PE=1 SV=1              | GN=Gbf1      | 1.84 |
| 68 | P08905     | Lysozyme C-2 OS=Mus musculus GN=Lyz2 PE=1 SV=2                                                | GN=Lyz2      | 1.83 |
| 69 | P62242     | 40S ribosomal protein S8 OS=Mus musculus GN=Rps8 PE=1 SV=2                                    | GN=Rps8      | 1.83 |
| 70 | A0A0A6YXQ0 | Protein Ighv8-8 (Fragment) OS=Mus musculus GN=Ighv8-8 PE=4 SV=1                               | GN=Ighv8-8   | 1.83 |
| 71 | Q9D8N0     | Elongation factor 1-gamma OS=Mus musculus GN=Eef1g PE=1 SV=3                                  | GN=Eef1g     | 1.83 |
| 72 | Q8BVF2     | Phosducin-like protein 3 OS=Mus musculus GN=Pdc13 PE=1 SV=1                                   | GN=Pdc13     | 1.82 |
| 73 | Q8K297     | Procollagen galactosyltransferase 1 OS=Mus musculus GN=Colgalt1 PE=1 SV=2                     | GN=Colgalt1  | 1.80 |
| 74 | F6V6T4     | Transmembrane emp24 domain-containing protein 2 (Fragment) OS=Mus musculus GN=Tmed2 PE=1 SV=1 | GN=Tmed2     | 1.80 |
| 75 | P62827     | GTP-binding nuclear protein Ran OS=Mus musculus GN=Ran PE=1 SV=3                              | GN=Ran       | 1.80 |
| 76 | A0A0R4J0Z1 | Protein disulfide-isomerase A4 OS=Mus musculus GN=Pdia4 PE=1 SV=1                             | GN=Pdia4     | 1.79 |
| 77 | P34914     | Bifunctional epoxide hydrolase 2 OS=Mus musculus GN=Ephx2 PE=1 SV=2                           | GN=Ephx2     | 1.79 |
| 78 | E9PW66     | Nucleosome assembly protein 1-like 1 OS=Mus musculus GN=Nap111 PE=1 SV=1                      | GN=Nap111    | 1.79 |
| 79 | P14873     | Microtubule-associated protein 1B OS=Mus musculus GN=Map1b PE=1 SV=2                          | GN=Map1b     | 1.78 |
| 80 | Q61881     | DNA replication licensing factor MCM7 OS=Mus musculus GN=Mcm7 PE=1 SV=1                       | GN=Mcm7      | 1.78 |
| 81 | P07759     | Serine protease inhibitor A3K OS=Mus musculus GN=Serpina3k PE=1 SV=2                          | GN=Serpina3k | 1.78 |
| 82 | P28649     | Aromatase OS=Mus musculus GN=Cyp19a1 PE=2 SV=1                                                | GN=Cyp19a1   | 1.78 |
| 83 | P27773     | Protein disulfide-isomerase A3 OS=Mus musculus GN=Pdia3 PE=1 SV=2                             | GN=Pdia3     | 1.77 |
| 84 | Q3TIV5     | Zinc finger CCCH domain-containing protein 15 OS=Mus musculus GN=Zc3h15 PE=1 SV=2             | GN=Zc3h15    | 1.77 |
| 85 | P58252     | Elongation factor 2 OS=Mus musculus GN=Eef2 PE=1 SV=2                                         | GN=Eef2      | 1.77 |
| 86 | Q6VSS7     | Protein Rhox8 OS=Mus musculus GN=Rhox8 PE=1 SV=1                                              | GN=Rhox8     | 1.76 |
| 87 | Q9CQ43     | Deoxyuridine triphosphatase OS=Mus musculus GN=Dut PE=1 SV=1                                  | GN=Dut       | 1.76 |
| 88 | Q9D823     | 60S ribosomal protein L37 OS=Mus musculus GN=Rpl37 PE=3 SV=3                                  | GN=Rpl37     | 1.76 |
| 89 | Q8R2P8     | Lysine-tRNA ligase OS=Mus musculus GN=Kars PE=1 SV=1                                          | GN=Kars      | 1.75 |
| 90 | P24369     | Peptidyl-prolyl cis-trans isomerase B OS=Mus musculus GN=Ppib PE=1 SV=2                       | GN=Ppib      | 1.75 |
| 91 | Q3UMP4     | Plasminogen activator inhibitor 1 RNA-binding protein OS=Mus musculus GN=Serbp1 PE=1 SV=1     | GN=Serbp1    | 1.74 |
| 92 | P19253     | 60S ribosomal protein L13a OS=Mus musculus GN=Rpl13a PE=1 SV=4                                | GN=Rpl13a    | 1.74 |
| 93 | P63017     | Heat shock cognate 71 kDa protein OS=Mus musculus GN=Hspa8 PE=1 SV=1                          | GN=Hspa8     | 1.73 |
| 94 | Q61553     | Fascin OS=Mus musculus GN=Fscn1 PE=1 SV=4                                                     | GN=Fscn1     | 1.73 |
| 95 | Q921Y0     | MOB kinase activator 1A OS=Mus musculus GN=Mob1a PE=2 SV=3                                    | GN=Mob1a     | 1.73 |
| 96 | F6RPJ9     | Insulin-degrading enzyme (Fragment) OS=Mus musculus GN=Ide PE=1 SV=1                          | GN=Ide       | 1.73 |

|     |            |                                                                                       |            |      |
|-----|------------|---------------------------------------------------------------------------------------|------------|------|
| 97  | A2A547     | Ribosomal protein L19 OS=Mus musculus GN=Rpl19 PE=1 SV=1                              | GN=Rpl19   | 1.72 |
| 98  | B1ARA3     | 60S ribosomal protein L26 (Fragment) OS=Mus musculus GN=Rpl26 PE=1 SV=1               | GN=Rpl26   | 1.72 |
| 99  | Q8VDJ3     | Vigilin OS=Mus musculus GN=Hdlbp PE=1 SV=1                                            | GN=Hdlbp   | 1.71 |
| 100 | Q8CDN6     | Thioredoxin-like protein 1 OS=Mus musculus GN=Txn1 PE=1 SV=3                          | GN=Txn1    | 1.71 |
| 101 | P14115     | 60S ribosomal protein L27a OS=Mus musculus GN=Rpl27a PE=1 SV=5                        | GN=Rpl27a  | 1.71 |
| 102 | A0A1D5RLT6 | GRAM domain-containing protein 1B OS=Mus musculus GN=Gramd1b PE=4 SV=1                | GN=Gramd1b | 1.69 |
| 103 | Q8VCC9     | Spondin-1 OS=Mus musculus GN=Spon1 PE=1 SV=1                                          | GN=Spon1   | 1.69 |
| 104 | P62270     | 40S ribosomal protein S18 OS=Mus musculus GN=Rps18 PE=1 SV=3                          | GN=Rps18   | 1.68 |
| 105 | Q923L7     | Ear6 protein OS=Mus musculus GN=Ear6 PE=1 SV=1                                        | GN=Ear6    | 1.68 |
| 106 | P04441     | H-2 class II histocompatibility antigen gamma chain OS=Mus musculus GN=Cd74 PE=1 SV=3 | GN=Cd74    | 1.67 |
| 107 | Z4YJT3     | La-related protein 1 OS=Mus musculus GN=Larp1 PE=1 SV=1                               | GN=Larp1   | 1.67 |
| 108 | E9Q7B0     | Prolyl 4-hydroxylase subunit alpha-1 OS=Mus musculus GN=P4ha1 PE=1 SV=1               | GN=P4ha1   | 1.67 |
| 109 | Q9DBX6     | Cytochrome P450 2S1 OS=Mus musculus GN=Cyp2s1 PE=1 SV=1                               | GN=Cyp2s1  | 1.67 |
| 110 | P61358     | 60S ribosomal protein L27 OS=Mus musculus GN=Rpl27 PE=1 SV=2                          | GN=Rpl27   | 1.66 |
| 111 | E9QKZ2     | Importin-9 OS=Mus musculus GN=Ipo9 PE=1 SV=1                                          | GN=Ipo9    | 1.66 |
| 112 | E9PZJ8     | Activating signal cointegrator 1 complex subunit 3 OS=Mus musculus GN=Ascc3 PE=1 SV=1 | GN=Ascc3   | 1.66 |
| 113 | Q91WT7     | 3-alpha-hydroxysteroid dehydrogenase type 1 OS=Mus musculus GN=Akr1c14 PE=1 SV=1      | GN=Akr1c14 | 1.66 |
| 114 | Q78PY7     | Staphylococcal nuclease domain-containing protein 1 OS=Mus musculus GN=Snd1 PE=1 SV=1 | GN=Snd1    | 1.66 |
| 115 | Q01853     | Transitional endoplasmic reticulum ATPase OS=Mus musculus GN=Vcp PE=1 SV=4            | GN=Vcp     | 1.66 |
| 116 | Q99LE6     | ATP-binding cassette sub-family F member 2 OS=Mus musculus GN=Abcf2 PE=1 SV=1         | GN=Abcf2   | 1.66 |
| 117 | Q8BMK4     | Cytoskeleton-associated protein 4 OS=Mus musculus GN=Ckap4 PE=1 SV=2                  | GN=Ckap4   | 1.65 |
| 118 | A2AGT5     | Cytoskeleton-associated protein 5 OS=Mus musculus GN=Ckap5 PE=1 SV=1                  | GN=Ckap5   | 1.65 |
| 119 | Q8CG48     | Structural maintenance of chromosomes protein 2 OS=Mus musculus GN=Smc2 PE=1 SV=2     | GN=Smc2    | 1.65 |
| 120 | Q60865     | Caprin-1 OS=Mus musculus GN=Caprin1 PE=1 SV=2                                         | GN=Caprin1 | 1.65 |
| 121 | Q9JIF7     | Coatmer subunit beta OS=Mus musculus GN=Copb1 PE=1 SV=1                               | GN=Copb1   | 1.64 |
| 122 | Q8BH76     | DNA polymerase delta subunit 3 OS=Mus musculus GN=Pold3 PE=1 SV=1                     | GN=Pold3   | 1.64 |
| 123 | Q3THK7     | GMP synthase [glutamine-hydrolyzing] OS=Mus musculus GN=Gmps PE=1 SV=2                | GN=Gmps    | 1.64 |
| 124 | P80313     | T-complex protein 1 subunit eta OS=Mus musculus GN=Cct7 PE=1 SV=1                     | GN=Cct7    | 1.64 |
| 125 | Q9EPK6     | Nucleotide exchange factor SIL1 OS=Mus musculus GN=Sih1 PE=1 SV=2                     | GN=Sih1    | 1.64 |
| 126 | P24547     | Inosine-5'-monophosphate dehydrogenase 2 OS=Mus musculus GN=Impdh2 PE=1 SV=2          | GN=Impdh2  | 1.63 |
| 127 | Q91W50     | Cold shock domain-containing protein E1 OS=Mus musculus GN=Csde1 PE=1 SV=1            | GN=Csde1   | 1.63 |
| 128 | A0A0R4J170 | Transcription activator BRG1 OS=Mus musculus GN=Smarca4 PE=1 SV=1                     | GN=Smarca4 | 1.63 |
| 129 | B1AU75     | Nuclear autoantigenic sperm protein OS=Mus musculus GN=Nasp PE=1 SV=1                 | GN=Nasp    | 1.63 |



|     |            |                                                                                              |              |      |
|-----|------------|----------------------------------------------------------------------------------------------|--------------|------|
| 130 | Q8CG47     | Structural maintenance of chromosomes protein 4 OS=Mus musculus GN=Smc4 PE=1 SV=1            | GN=Smc4      | 1.62 |
| 131 | Q5XJF6     | Ribosomal protein OS=Mus musculus GN=Rpl10a PE=1 SV=1                                        | GN=Rpl10a    | 1.62 |
| 132 | P60229     | Eukaryotic translation initiation factor 3 subunit E OS=Mus musculus GN=Eif3e PE=1 SV=1      | GN=Eif3e     | 1.62 |
| 133 | P62702     | 40S ribosomal protein S4, X isoform OS=Mus musculus GN=Rps4x PE=1 SV=2                       | GN=Rps4x     | 1.62 |
| 134 | O88569     | Heterogeneous nuclear ribonucleoproteins A2/B1 OS=Mus musculus GN=Hnrnpa2b1 PE=1 SV=2        | GN=Hnrnpa2b1 | 1.61 |
| 135 | P97310     | DNA replication licensing factor MCM2 OS=Mus musculus GN=Mcm2 PE=1 SV=3                      | GN=Mcm2      | 1.61 |
| 136 | Q6ZWN5     | 40S ribosomal protein S9 OS=Mus musculus GN=Rps9 PE=1 SV=3                                   | GN=Rps9      | 1.61 |
| 137 | Q3UNN4     | SWI/SNF complex subunit SMARCC1 OS=Mus musculus GN=Smarcc1 PE=1 SV=1                         | GN=Smarcc1   | 1.61 |
| 138 | O35685     | Nuclear migration protein nudC OS=Mus musculus GN=Nudec PE=1 SV=1                            | GN=Nudec     | 1.60 |
| 139 | P60710     | Actin, cytoplasmic 1 OS=Mus musculus GN=Actb PE=1 SV=1                                       | GN=Actb      | 1.60 |
| 140 | P05201     | Aspartate aminotransferase, cytoplasmic OS=Mus musculus GN=Got1 PE=1 SV=3                    | GN=Got1      | 1.60 |
| 141 | P07901     | Heat shock protein HSP 90-alpha OS=Mus musculus GN=Hsp90aa1 PE=1 SV=4                        | GN=Hsp90aa1  | 1.60 |
| 142 | Q60864     | Stress-induced-phosphoprotein 1 OS=Mus musculus GN=Stip1 PE=1 SV=1                           | GN=Stip1     | 1.60 |
| 143 | Q91YW3     | Dnaj homolog subfamily C member 3 OS=Mus musculus GN=Dnajc3 PE=1 SV=1                        | GN=Dnajc3    | 1.60 |
| 144 | A0A075B666 | Protein Igkv13-85 (Fragment) OS=Mus musculus GN=Igkv13-85 PE=4 SV=5                          | GN=Igkv13-85 | 1.60 |
| 145 | Q8CGC7     | Bifunctional glutamate/proline--tRNA ligase OS=Mus musculus GN=Eprs PE=1 SV=4                | GN=Eprs      | 1.59 |
| 146 | Q9WVL3     | Solute carrier family 12 member 7 OS=Mus musculus GN=Slc12a7 PE=1 SV=1                       | GN=Slc12a7   | 1.58 |
| 147 | P14869     | 60S acidic ribosomal protein P0 OS=Mus musculus GN=Rplp0 PE=1 SV=3                           | GN=Rplp0     | 1.58 |
| 148 | Q08EB6     | CLIP associating protein 2 OS=Mus musculus GN=Clasp2 PE=1 SV=1                               | GN=Clasp2    | 1.58 |
| 149 | Q04750     | DNA topoisomerase 1 OS=Mus musculus GN=Top1 PE=1 SV=2                                        | GN=Top1      | 1.58 |
| 150 | Q6PB66     | Leucine-rich PPR motif-containing protein, mitochondrial OS=Mus musculus GN=Lrpprc PE=1 SV=2 | GN=Lrpprc    | 1.57 |
| 151 | Q3TML0     | Protein disulfide-isomerase A6 OS=Mus musculus GN=Pdia6 PE=1 SV=1                            | GN=Pdia6     | 1.57 |
| 152 | P49722     | Proteasome subunit alpha type-2 OS=Mus musculus GN=Psm2 PE=1 SV=3                            | GN=Psm2      | 1.56 |
| 153 | Q61576     | Peptidyl-prolyl cis-trans isomerase FKBP10 OS=Mus musculus GN=Fkbp10 PE=1 SV=2               | GN=Fkbp10    | 1.56 |
| 154 | E9PZF0     | Nucleoside diphosphate kinase OS=Mus musculus GN=Gm20390 PE=3 SV=1                           | GN=Gm20390   | 1.56 |
| 155 | P12970     | 60S ribosomal protein L7a OS=Mus musculus GN=Rpl7a PE=1 SV=2                                 | GN=Rpl7a     | 1.55 |
| 156 | Q99M31     | Heat shock 70 kDa protein 14 OS=Mus musculus GN=Hspa14 PE=1 SV=2                             | GN=Hspa14    | 1.55 |
| 157 | Q9CZX8     | 40S ribosomal protein S19 OS=Mus musculus GN=Rps19 PE=1 SV=3                                 | GN=Rps19     | 1.55 |
| 158 | F6TQW2     | Protein Ighg2c OS=Mus musculus GN=Ighg2c PE=1 SV=1                                           | GN=Ighg2c    | 1.54 |
| 159 | P30416     | Peptidyl-prolyl cis-trans isomerase FKBP4 OS=Mus musculus GN=Fkbp4 PE=1 SV=5                 | GN=Fkbp4     | 1.54 |
| 160 | P57776     | Elongation factor 1-delta OS=Mus musculus GN=Eef1d PE=1 SV=3                                 | GN=Eef1d     | 1.54 |
| 161 | P56379     | 6.8 kDa mitochondrial proteolipid OS=Mus musculus GN=Mp68 PE=1 SV=1                          | GN=Mp68      | 1.54 |
| 162 | Q6ZWZ4     | 60S ribosomal protein L36 OS=Mus musculus GN=Rpl36 PE=1 SV=1                                 | GN=Rpl36     | 1.53 |

|     |            |                                                                                                     |             |      |
|-----|------------|-----------------------------------------------------------------------------------------------------|-------------|------|
| 163 | Q8R050     | Eukaryotic peptide chain release factor GTP-binding subunit ERF3A OS=Mus musculus GN=Gsp1 PE=1 SV=2 | GN=Gsp1     | 1.53 |
| 164 | P63038     | 60 kDa heat shock protein, mitochondrial OS=Mus musculus GN=Hspd1 PE=1 SV=1                         | GN=Hspd1    | 1.53 |
| 165 | D3Z0F5     | COP9 signalosome complex subunit 6 OS=Mus musculus GN=Cops6 PE=1 SV=1                               | GN=Cops6    | 1.52 |
| 166 | Q9QXS6     | Drebrin OS=Mus musculus GN=Dbn1 PE=1 SV=4                                                           | GN=Dbn1     | 1.52 |
| 167 | P14148     | 60S ribosomal protein L7 OS=Mus musculus GN=Rpl7 PE=1 SV=2                                          | GN=Rpl7     | 1.52 |
| 168 | P35564     | Calnexin OS=Mus musculus GN=Canx PE=1 SV=1                                                          | GN=Canx     | 1.52 |
| 169 | Q6PGH2     | Hematological and neurological expressed 1-like protein OS=Mus musculus GN=Hn11 PE=1 SV=1           | GN=Hn11     | 1.51 |
| 170 | Q80YX1     | Tenascin OS=Mus musculus GN=Tnc PE=1 SV=1                                                           | GN=Tnc      | 1.51 |
| 171 | E9Q035     | Protein Gm20425 OS=Mus musculus GN=Gm20425 PE=4 SV=1                                                | GN=Gm20425  | 1.51 |
| 172 | D3Z136     | Elongation of very long chain fatty acids protein (Fragment) OS=Mus musculus GN=Elov15 PE=1 SV=1    | GN=Elov15   | 1.51 |
| 173 | Q6PHQ8     | N-alpha-acetyltransferase 35, NatC auxiliary subunit OS=Mus musculus GN=Naa35 PE=1 SV=1             | GN=Naa35    | 1.50 |
| 174 | Q9ERK4     | Exportin-2 OS=Mus musculus GN=Cse11 PE=1 SV=1                                                       | GN=Cse11    | 1.50 |
| 175 | Q9Z1Z0     | General vesicular transport factor p115 OS=Mus musculus GN=Uso1 PE=1 SV=2                           | GN=Uso1     | 1.50 |
| 176 | Q99020     | Heterogeneous nuclear ribonucleoprotein A/B OS=Mus musculus GN=Hnrpab PE=1 SV=1                     | GN=Hnrpab   | 1.50 |
| 177 | Q05D44     | Eukaryotic translation initiation factor 5B OS=Mus musculus GN=Eif5b PE=1 SV=2                      | GN=Eif5b    | 1.50 |
| 178 | A0A140T8T4 | Protein Rpl9-ps6 OS=Mus musculus GN=Rpl9-ps6 PE=4 SV=1                                              | GN=Rpl9-ps6 | 1.49 |
| 179 | Q9CQN1     | Heat shock protein 75 kDa, mitochondrial OS=Mus musculus GN=Trap1 PE=1 SV=1                         | GN=Trap1    | 1.49 |
| 180 | Q3TUE1     | Far upstream element-binding protein 1 OS=Mus musculus GN=Fubp1 PE=1 SV=1                           | GN=Fubp1    | 1.49 |

## up-regulated 1.5-fold proteins

| N  | Citable Accession | Name                                                                                               | Gene Name  | Fold Change |
|----|-------------------|----------------------------------------------------------------------------------------------------|------------|-------------|
| 1  | Q3U7R1            | Extended synaptotagmin-1 OS=Mus musculus GN=Esy1 PE=1 SV=2                                         | GN=Esy1    | 1.51        |
| 2  | E9QJW9            | Tryptase beta-2 OS=Mus musculus GN=Tpsb2 PE=1 SV=1                                                 | GN=Tpsb2   | 1.51        |
| 3  | Q9D051            | Pyruvate dehydrogenase E1 component subunit beta, mitochondrial OS=Mus musculus GN=Pdhh PE=1 SV=1  | GN=Pdhh    | 1.51        |
| 4  | Q3ULJ0            | Glycerol-3-phosphate dehydrogenase 1-like protein OS=Mus musculus GN=Gpd11 PE=1 SV=2               | GN=Gpd11   | 1.51        |
| 5  | A0A0R4J0P1        | Acyl-Coenzyme A dehydrogenase family, member 8 OS=Mus musculus GN=Acad8 PE=1 SV=1                  | GN=Acad8   | 1.51        |
| 6  | A0A0J9YUZ4        | High mobility group protein B1 (Fragment) OS=Mus musculus GN=Hmgb1 PE=1 SV=1                       | GN=Hmgb1   | 1.52        |
| 7  | E9QP62            | LIM and senescent cell antigen-like-containing domain protein 1 OS=Mus musculus GN=Lims1 PE=1 SV=1 | GN=Lims1   | 1.52        |
| 8  | O70318            | Band 4.1-like protein 2 OS=Mus musculus GN=Epb4112 PE=1 SV=2                                       | GN=Epb4112 | 1.52        |
| 9  | Q8CFB8            | Poly [ADP-ribose] polymerase OS=Mus musculus GN=Parp3 PE=1 SV=1                                    | GN=Parp3   | 1.52        |
| 10 | P14733            | Lamin-B1 OS=Mus musculus GN=Lmn1 PE=1 SV=3                                                         | GN=Lmn1    | 1.52        |
| 11 | Q9QZQ8            | Core histone macro-H2A.1 OS=Mus musculus GN=H2afy PE=1 SV=3                                        | GN=H2afy   | 1.53        |
| 12 | A0A140T8W1        | Collagen alpha-5(VI) chain OS=Mus musculus GN=Col6a5 PE=1 SV=1                                     | GN=Col6a5  | 1.54        |

|    |            |                                                                                                       |             |      |
|----|------------|-------------------------------------------------------------------------------------------------------|-------------|------|
| 13 | Q01339     | Beta-2-glycoprotein 1 OS=Mus musculus GN=ApoH PE=1 SV=1                                               | GN=ApoH     | 1.54 |
| 14 | P14602     | Heat shock protein beta-1 OS=Mus musculus GN=Hspb1 PE=1 SV=3                                          | GN=Hspb1    | 1.54 |
| 15 | Q91XH5     | Sepiapterin reductase OS=Mus musculus GN=Spr PE=1 SV=1                                                | GN=Spr      | 1.55 |
| 16 | A2AJY2     | Collagen alpha-1(XV) chain OS=Mus musculus GN=Col15a1 PE=1 SV=1                                       | GN=Col15a1  | 1.55 |
| 17 | J3QQ16     | Protein Col6a3 OS=Mus musculus GN=Col6a3 PE=1 SV=1                                                    | GN=Col6a3   | 1.56 |
| 18 | Q99JA0     | Calcitonin gene-related peptide 1 OS=Mus musculus GN=Calca PE=2 SV=1                                  | GN=Calca    | 1.56 |
| 19 | Q91Y97     | Fructose-bisphosphate aldolase B OS=Mus musculus GN=Aldob PE=1 SV=3                                   | GN=Aldob    | 1.57 |
| 20 | P08226     | Apolipoprotein E OS=Mus musculus GN=ApoE PE=1 SV=2                                                    | GN=ApoE     | 1.57 |
| 21 | P10833     | Ras-related protein R-Ras OS=Mus musculus GN=Rras PE=1 SV=1                                           | GN=Rras     | 1.58 |
| 22 | Q9R0P9     | Ubiquitin carboxyl-terminal hydrolase isozyme L1 OS=Mus musculus GN=Uchl1 PE=1 SV=1                   | GN=Uchl1    | 1.58 |
| 23 | Q5SYD0     | Unconventional myosin-Id OS=Mus musculus GN=Myo1d PE=1 SV=1                                           | GN=Myo1d    | 1.58 |
| 24 | Q8BFQ1     | Prosaposin OS=Mus musculus GN=Psap PE=1 SV=1                                                          | GN=Psap     | 1.58 |
| 25 | A2AQZ7     | Phytanoyl-CoA dioxygenase domain-containing protein 1 OS=Mus musculus GN=Phyhd1 PE=1 SV=1             | GN=Phyhd1   | 1.58 |
| 26 | P20918     | Plasminogen OS=Mus musculus GN=Plg PE=1 SV=3                                                          | GN=Plg      | 1.59 |
| 27 | P32020     | Non-specific lipid-transfer protein OS=Mus musculus GN=Sep2 PE=1 SV=3                                 | GN=Sep2     | 1.59 |
| 28 | P19001     | Keratin, type 1 cytoskeletal 19 OS=Mus musculus GN=Krt19 PE=1 SV=1                                    | GN=Krt19    | 1.59 |
| 29 | Q99K41     | EMILIN-1 OS=Mus musculus GN=Emilin1 PE=1 SV=1                                                         | GN=Emilin1  | 1.60 |
| 30 | P84228     | Histone H3.2 OS=Mus musculus GN=Hist1h3b PE=1 SV=2                                                    | GN=Hist1h3b | 1.61 |
| 31 | Q99MZ7     | Peroxisomal trans-2-enoyl-CoA reductase OS=Mus musculus GN=Peer PE=1 SV=1                             | GN=Peer     | 1.61 |
| 32 | P11531     | Dystrophin OS=Mus musculus GN=Dmd PE=1 SV=3                                                           | GN=Dmd      | 1.62 |
| 33 | Q91V76     | Ester hydrolase C11orf54 homolog OS=Mus musculus PE=1 SV=1                                            | GN=---      | 1.62 |
| 34 | Q8K0T0     | Reticulon-1 OS=Mus musculus GN=Rtn1 PE=1 SV=1                                                         | GN=Rtn1     | 1.62 |
| 35 | X1W118     | CMRF35-like molecule 9 (Fragment) OS=Mus musculus GN=Cd300lg PE=1 SV=7                                | GN=Cd300lg  | 1.62 |
| 36 | Q9WVK4     | EH domain-containing protein 1 OS=Mus musculus GN=Ehd1 PE=1 SV=1                                      | GN=Ehd1     | 1.62 |
| 37 | P13020     | Gelsolin OS=Mus musculus GN=Gsn PE=1 SV=3                                                             | GN=Gsn      | 1.62 |
| 38 | P14142     | Solute carrier family 2, facilitated glucose transporter member 4 OS=Mus musculus GN=Slc2a4 PE=1 SV=3 | GN=Slc2a4   | 1.62 |
| 39 | E9Q616     | Protein Ahnak OS=Mus musculus GN=Ahnak PE=1 SV=1                                                      | GN=Ahnak    | 1.62 |
| 40 | Q8BFW7     | Lipoma-preferred partner homolog OS=Mus musculus GN=Lpp PE=1 SV=1                                     | GN=Lpp      | 1.62 |
| 41 | E9PV48     | Protein Ifit3b OS=Mus musculus GN=Ifit3b PE=1 SV=1                                                    | GN=Ifit3b   | 1.62 |
| 42 | Q61001     | Laminin subunit alpha-5 OS=Mus musculus GN=Lama5 PE=1 SV=4                                            | GN=Lama5    | 1.63 |
| 43 | A0A0R4J016 | Acyl-CoA dehydrogenase family member 11 OS=Mus musculus GN=Acad11 PE=1 SV=1                           | GN=Acad11   | 1.63 |
| 44 | Q9Z2V4     | Phosphoenolpyruvate carboxykinase, cytosolic [GTP] OS=Mus musculus GN=Pck1 PE=1 SV=1                  | GN=Pck1     | 1.63 |
| 45 | Q61735     | Leukocyte surface antigen CD47 OS=Mus musculus GN=Cd47 PE=1 SV=2                                      | GN=Cd47     | 1.64 |

|    |            |                                                                                              |             |      |
|----|------------|----------------------------------------------------------------------------------------------|-------------|------|
| 46 | Q9Z0K8     | Pantetheinase OS=Mus musculus GN=Vnn1 PE=1 SV=3                                              | GN=Vnn1     | 1.64 |
| 47 | E9Q6R7     | Protein Utrn OS=Mus musculus GN=Utrn PE=1 SV=1                                               | GN=Utrn     | 1.64 |
| 48 | G3X8Q5     | Ceruloplasmin OS=Mus musculus GN=Cp PE=1 SV=1                                                | GN=Cp       | 1.65 |
| 49 | Q07797     | Galectin-3-binding protein OS=Mus musculus GN=Lgals3bp PE=1 SV=1                             | GN=Lgals3bp | 1.65 |
| 50 | Q8CGN5     | Perilipin-1 OS=Mus musculus GN=Plin1 PE=1 SV=2                                               | GN=Plin1    | 1.65 |
| 51 | Q8VDF2     | E3 ubiquitin-protein ligase UHRF1 OS=Mus musculus GN=Uhrf1 PE=1 SV=2                         | GN=Uhrf1    | 1.66 |
| 52 | M0QWP1     | Agrin OS=Mus musculus GN=Agm PE=1 SV=1                                                       | GN=Agm      | 1.66 |
| 53 | P21956     | Lactadherin OS=Mus musculus GN=Mfge8 PE=1 SV=3                                               | GN=Mfge8    | 1.66 |
| 54 | P18872     | Guanine nucleotide-binding protein G(o) subunit alpha OS=Mus musculus GN=Gnao1 PE=1 SV=3     | GN=Gnao1    | 1.67 |
| 55 | Q8CCK0     | Core histone macro-H2A.2 OS=Mus musculus GN=H2afy2 PE=1 SV=3                                 | GN=H2afy2   | 1.67 |
| 56 | A0A0R4J083 | Long-chain-specific acyl-CoA dehydrogenase, mitochondrial OS=Mus musculus GN=Acadl PE=1 SV=1 | GN=Acadl    | 1.67 |
| 57 | Q8BX02     | KN motif and ankyrin repeat domain-containing protein 2 OS=Mus musculus GN=Kank2 PE=1 SV=1   | GN=Kank2    | 1.68 |
| 58 | A2A7A7     | GDH/6PGL endoplasmic bifunctional protein OS=Mus musculus GN=H6pd PE=1 SV=1                  | GN=H6pd     | 1.68 |
| 59 | P08207     | Protein S100-A10 OS=Mus musculus GN=S100a10 PE=1 SV=2                                        | GN=S100a10  | 1.69 |
| 60 | Q4VWZ5     | Acyl-CoA-binding protein OS=Mus musculus GN=Dbi PE=1 SV=1                                    | GN=Dbi      | 1.69 |
| 61 | Q9R269     | Periplakin OS=Mus musculus GN=Ppl PE=1 SV=1                                                  | GN=Ppl      | 1.69 |
| 62 | P14152     | Malate dehydrogenase, cytoplasmic OS=Mus musculus GN=Mdh1 PE=1 SV=3                          | GN=Mdh1     | 1.69 |
| 63 | P35505     | Fumarylacetoacetase OS=Mus musculus GN=Fah PE=1 SV=2                                         | GN=Fah      | 1.69 |
| 64 | E9PWQ3     | Protein Col6a3 OS=Mus musculus GN=Col6a3 PE=1 SV=2                                           | GN=Col6a3   | 1.69 |
| 65 | P16125     | L-lactate dehydrogenase B chain OS=Mus musculus GN=Ldhb PE=1 SV=2                            | GN=Ldhb     | 1.70 |
| 66 | D3Z080     | Sorbin and SH3 domain-containing protein 2 OS=Mus musculus GN=Sorbs2 PE=1 SV=1               | GN=Sorbs2   | 1.70 |
| 67 | Q7TNG8     | Probable D-lactate dehydrogenase, mitochondrial OS=Mus musculus GN=Ldhd PE=1 SV=1            | GN=Ldhd     | 1.70 |
| 68 | Q9R0H0     | Peroxisomal acyl-coenzyme A oxidase 1 OS=Mus musculus GN=Acox1 PE=1 SV=5                     | GN=Acox1    | 1.70 |
| 69 | E9QN70     | Laminin subunit beta-1 OS=Mus musculus GN=Lamb1 PE=1 SV=1                                    | GN=Lamb1    | 1.72 |
| 70 | Q8R0Y6     | Cytosolic 10-formyltetrahydrofolate dehydrogenase OS=Mus musculus GN=Aldh1l1 PE=1 SV=1       | GN=Aldh1l1  | 1.72 |
| 71 | Q9CRB1     | Galectin OS=Mus musculus GN=Lgals7 PE=1 SV=1                                                 | GN=Lgals7   | 1.72 |
| 72 | P10649     | Glutathione S-transferase Mu 1 OS=Mus musculus GN=Gstm1 PE=1 SV=2                            | GN=Gstm1    | 1.73 |
| 73 | Q8K2I3     | Dimethylaniline monooxygenase [N-oxide-forming] 2 OS=Mus musculus GN=Fmo2 PE=1 SV=3          | GN=Fmo2     | 1.73 |
| 74 | E9PUM4     | Talin-2 OS=Mus musculus GN=Tln2 PE=1 SV=1                                                    | GN=Tln2     | 1.73 |
| 75 | Q8VHY0     | Chondroitin sulfate proteoglycan 4 OS=Mus musculus GN=Cspg4 PE=1 SV=3                        | GN=Cspg4    | 1.73 |
| 76 | Q9QXC1     | Fetuin-B OS=Mus musculus GN=Fetub PE=1 SV=1                                                  | GN=Fetub    | 1.74 |
| 77 | Q9D1H9     | Microfibril-associated glycoprotein 4 OS=Mus musculus GN=Mfap4 PE=1 SV=1                     | GN=Mfap4    | 1.74 |
| 78 | P33267     | Cytochrome P450 2F2 OS=Mus musculus GN=Cyp2f2 PE=1 SV=1                                      | GN=Cyp2f2   | 1.74 |

|     |        |                                                                                                         |              |      |
|-----|--------|---------------------------------------------------------------------------------------------------------|--------------|------|
| 79  | P40936 | Indolethylamine N-methyltransferase OS=Mus musculus GN=Inmt PE=1 SV=1                                   | GN=Inmt      | 1.74 |
| 80  | P11679 | Keratin, type II cytoskeletal 8 OS=Mus musculus GN=Krt8 PE=1 SV=4                                       | GN=Krt8      | 1.75 |
| 81  | P11404 | Fatty acid-binding protein, heart OS=Mus musculus GN=Fabp3 PE=1 SV=5                                    | GN=Fabp3     | 1.76 |
| 82  | P10493 | Nidogen-1 OS=Mus musculus GN=Nid1 PE=1 SV=2                                                             | GN=Nid1      | 1.76 |
| 83  | Q9CZS1 | Aldehyde dehydrogenase X, mitochondrial OS=Mus musculus GN=Aldh1b1 PE=1 SV=1                            | GN=Aldh1b1   | 1.77 |
| 84  | O35682 | Myeloid-associated differentiation marker OS=Mus musculus GN=Myadm PE=1 SV=2                            | GN=Myadm     | 1.77 |
| 85  | E9Q3B9 | Monoglyceride lipase OS=Mus musculus GN=Mgll PE=1 SV=1                                                  | GN=Mgll      | 1.77 |
| 86  | Q03734 | Serine protease inhibitor A3M OS=Mus musculus GN=Serpina3m PE=1 SV=2                                    | GN=Serpina3m | 1.77 |
| 87  | Q64282 | Interferon-induced protein with tetratricopeptide repeats 1 OS=Mus musculus GN=Ifit1 PE=1 SV=2          | GN=Ifit1     | 1.78 |
| 88  | Q9D9V3 | Ethylmalonyl-CoA decarboxylase OS=Mus musculus GN=Echdc1 PE=1 SV=2                                      | GN=Echdc1    | 1.79 |
| 89  | Q8BX70 | Vacuolar protein sorting-associated protein 13C OS=Mus musculus GN=Vps13c PE=1 SV=2                     | GN=Vps13c    | 1.80 |
| 90  | Q8BW75 | Amine oxidase [flavin-containing] B OS=Mus musculus GN=Maob PE=1 SV=4                                   | GN=Maob      | 1.80 |
| 91  | P54869 | Hydroxymethylglutaryl-CoA synthase, mitochondrial OS=Mus musculus GN=Hmges2 PE=1 SV=2                   | GN=Hmges2    | 1.80 |
| 92  | Q91VJ2 | Protein kinase C delta-binding protein OS=Mus musculus GN=Prkcdbp PE=1 SV=1                             | GN=Prkcdbp   | 1.80 |
| 93  | P43883 | Perilipin-2 OS=Mus musculus GN=Plin2 PE=1 SV=2                                                          | GN=Plin2     | 1.80 |
| 94  | F8WIX8 | Histone H2A OS=Mus musculus GN=Hist1h2a1 PE=3 SV=1                                                      | GN=Hist1h2a1 | 1.80 |
| 95  | P20152 | Vimentin OS=Mus musculus GN=Vim PE=1 SV=3                                                               | GN=Vim       | 1.80 |
| 96  | B8JK39 | Integrin alpha-9 OS=Mus musculus GN=Itga9 PE=1 SV=1                                                     | GN=Itga9     | 1.80 |
| 97  | P10648 | Glutathione S-transferase A2 OS=Mus musculus GN=Gsta2 PE=1 SV=3                                         | GN=Gsta2     | 1.80 |
| 98  | Q9Z2A9 | Gamma-glutamyltransferase 5 OS=Mus musculus GN=Ggt5 PE=1 SV=2                                           | GN=Ggt5      | 1.81 |
| 99  | E9Q0S6 | Protein Tns1 OS=Mus musculus GN=Tns1 PE=1 SV=1                                                          | GN=Tns1      | 1.82 |
| 100 | Q64727 | Vinculin OS=Mus musculus GN=Vcl PE=1 SV=4                                                               | GN=Vcl       | 1.83 |
| 101 | Q08091 | Calponin-1 OS=Mus musculus GN=Cnn1 PE=1 SV=1                                                            | GN=Cnn1      | 1.83 |
| 102 | E9QNA7 | Sorbin and SH3 domain-containing protein 1 OS=Mus musculus GN=Sorbs1 PE=1 SV=1                          | GN=Sorbs1    | 1.84 |
| 103 | Q9R1M5 | NACHT, LRR and PYD domains-containing protein 5 OS=Mus musculus GN=Nlrp5 PE=1 SV=2                      | GN=Nlrp5     | 1.84 |
| 104 | Q9Z2D6 | Methyl-CpG-binding protein 2 OS=Mus musculus GN=Mecp2 PE=1 SV=1                                         | GN=Mecp2     | 1.85 |
| 105 | Q9R111 | Guanine deaminase OS=Mus musculus GN=Gda PE=1 SV=1                                                      | GN=Gda       | 1.85 |
| 106 | P58242 | Acid sphingomyelinase-like phosphodiesterase 3b OS=Mus musculus GN=Smpd3b PE=1 SV=1                     | GN=Smpd3b    | 1.86 |
| 107 | P62806 | Histone H4 OS=Mus musculus GN=Hist1h4a PE=1 SV=2                                                        | GN=Hist1h4a  | 1.86 |
| 108 | Q62009 | Periostin OS=Mus musculus GN=Postn PE=1 SV=2                                                            | GN=Postn     | 1.88 |
| 109 | E9PZ16 | Basement membrane-specific heparan sulfate proteoglycan core protein OS=Mus musculus GN=Hspg2 PE=1 SV=1 | GN=Hspg2     | 1.88 |
| 110 | P00920 | Carbonic anhydrase 2 OS=Mus musculus GN=Ca2 PE=1 SV=4                                                   | GN=Ca2       | 1.88 |
| 111 | P28843 | Dipeptidyl peptidase 4 OS=Mus musculus GN=Dpp4 PE=1 SV=3                                                | GN=Dpp4      | 1.89 |

|     |            |                                                                                                               |              |      |
|-----|------------|---------------------------------------------------------------------------------------------------------------|--------------|------|
| 112 | P51910     | Apolipoprotein D OS=Mus musculus GN=Apod PE=1 SV=1                                                            | GN=Apod      | 1.93 |
| 113 | B7ZN28     | Papilin OS=Mus musculus GN=Papln PE=1 SV=1                                                                    | GN=Papln     | 1.93 |
| 114 | Q60847     | Collagen alpha-1(XII) chain OS=Mus musculus GN=Col12a1 PE=2 SV=3                                              | GN=Col12a1   | 1.93 |
| 115 | G3X8X3     | Large neutral amino acids transporter small subunit 3 OS=Mus musculus GN=Slc43a1 PE=1 SV=1                    | GN=Slc43a1   | 1.93 |
| 116 | Q9ESU7     | Amino acid transporter OS=Mus musculus GN=Slc1a5 PE=1 SV=1                                                    | GN=Slc1a5    | 1.94 |
| 117 | Q9WVB3     | Transducin-like enhancer protein 6 OS=Mus musculus GN=Tle6 PE=1 SV=1                                          | GN=Tle6      | 1.95 |
| 118 | Q62005     | Zona pellucida sperm-binding protein 1 OS=Mus musculus GN=Zp1 PE=1 SV=1                                       | GN=Zp1       | 1.95 |
| 119 | Q9WT17     | Unconventional myosin-Ic OS=Mus musculus GN=Myo1c PE=1 SV=2                                                   | GN=Myo1c     | 1.98 |
| 120 | P10922     | Histone H1.0 OS=Mus musculus GN=H1f0 PE=2 SV=4                                                                | GN=H1f0      | 2.00 |
| 121 | P97449     | Aminopeptidase N OS=Mus musculus GN=Anpep PE=1 SV=4                                                           | GN=Anpep     | 2.00 |
| 122 | Q9D997     | N-acetyl-D-glucosamine kinase OS=Mus musculus GN=Nagk PE=1 SV=1                                               | GN=Nagk      | 2.01 |
| 123 | P46412     | Glutathione peroxidase 3 OS=Mus musculus GN=Gpx3 PE=1 SV=2                                                    | GN=Gpx3      | 2.01 |
| 124 | Q8CGB6     | Tensin-2 OS=Mus musculus GN=Tns2 PE=1 SV=1                                                                    | GN=Tns2      | 2.01 |
| 125 | Q6B966     | NACHT, LRR and PYD domains-containing protein 14 OS=Mus musculus GN=Nlrp14 PE=2 SV=2                          | GN=Nlrp14    | 2.01 |
| 126 | Q61292     | Laminin subunit beta-2 OS=Mus musculus GN=Lamb2 PE=1 SV=2                                                     | GN=Lamb2     | 2.02 |
| 127 | Q9DBM2     | Peroxisomal bifunctional enzyme OS=Mus musculus GN=Ehhadh PE=1 SV=4                                           | GN=Ehhadh    | 2.03 |
| 128 | Q9WVL0     | Maleylacetoacetate isomerase OS=Mus musculus GN=Gstz1 PE=1 SV=1                                               | GN=Gstz1     | 2.04 |
| 129 | Q64471     | Glutathione S-transferase theta-1 OS=Mus musculus GN=Gstt1 PE=1 SV=4                                          | GN=Gstt1     | 2.04 |
| 130 | Q60675     | Laminin subunit alpha-2 OS=Mus musculus GN=Lama2 PE=1 SV=2                                                    | GN=Lama2     | 2.04 |
| 131 | Q64475     | Histone H2B type 1-B OS=Mus musculus GN=Hist1h2bb PE=1 SV=3                                                   | GN=Hist1h2bb | 2.05 |
| 132 | Q9WVH9     | Fibulin-5 OS=Mus musculus GN=Fbln5 PE=1 SV=1                                                                  | GN=Fbln5     | 2.05 |
| 133 | P06728     | Apolipoprotein A-IV OS=Mus musculus GN=Apoa4 PE=1 SV=3                                                        | GN=Apoa4     | 2.06 |
| 134 | P21619     | Lamin-B2 OS=Mus musculus GN=Lmb2 PE=1 SV=2                                                                    | GN=Lmb2      | 2.06 |
| 135 | Q64GA5     | Egg and early embryo abundant protein OS=Mus musculus GN=Pla2g4c PE=1 SV=1                                    | GN=Pla2g4c   | 2.08 |
| 136 | P97315     | Cysteine and glycine-rich protein 1 OS=Mus musculus GN=Csrp1 PE=1 SV=3                                        | GN=Csrp1     | 2.08 |
|     |            | Serine (Or cysteine) peptidase inhibitor, clade A, member 3N, isoform CRA_a OS=Mus musculus GN=Serpina3n PE=1 |              |      |
| 137 | G3X8T9     | SV=1                                                                                                          | GN=Serpina3n | 2.09 |
| 138 | O35452     | Protein Tnxb OS=Mus musculus GN=Tnxb PE=1 SV=1                                                                | GN=Tnxb      | 2.11 |
| 139 | A0A087WRE7 | Hydroxyacid-oxoacid transhydrogenase, mitochondrial (Fragment) OS=Mus musculus GN=Adhfe1 PE=1 SV=1            | GN=Adhfe1    | 2.11 |
| 140 | Q91YR9     | Prostaglandin reductase 1 OS=Mus musculus GN=Ptgr1 PE=1 SV=2                                                  | GN=Ptgr1     | 2.12 |
| 141 | F8VQJ3     | Laminin subunit gamma-1 OS=Mus musculus GN=Lamc1 PE=1 SV=1                                                    | GN=Lamc1     | 2.14 |
| 142 | Q00519     | Xanthine dehydrogenase/oxidase OS=Mus musculus GN=Xdh PE=1 SV=5                                               | GN=Xdh       | 2.14 |
| 143 | P82347     | Delta-sarcoglycan OS=Mus musculus GN=Sgcd PE=1 SV=1                                                           | GN=Sgcd      | 2.16 |

|     |        |                                                                                                           |             |      |
|-----|--------|-----------------------------------------------------------------------------------------------------------|-------------|------|
| 144 | L7N1W9 | NACHT, LRR and PYD domains-containing protein 4F OS=Mus musculus GN=Nlrp4f PE=4 SV=1                      | GN=Nlrp4f   | 2.16 |
| 145 | G5E8R3 | Pyruvate carboxylase OS=Mus musculus GN=Pcx PE=1 SV=1                                                     | GN=Pcx      | 2.19 |
| 146 | Q9WTR5 | Cadherin-13 OS=Mus musculus GN=Cdh13 PE=1 SV=2                                                            | GN=Cdh13    | 2.19 |
| 147 | P17563 | Selenium-binding protein 1 OS=Mus musculus GN=Selenbp1 PE=1 SV=2                                          | GN=Selenbp1 | 2.19 |
| 148 | O09131 | Glutathione S-transferase omega-1 OS=Mus musculus GN=Gsto1 PE=1 SV=2                                      | GN=Gsto1    | 2.20 |
| 149 | P48678 | Prelamin-A/C OS=Mus musculus GN=Lmna PE=1 SV=2                                                            | GN=Lmna     | 2.21 |
| 150 | A8DUK4 | Beta-globin OS=Mus musculus GN=Hbbt1 PE=1 SV=1                                                            | GN=Hbbt1    | 2.22 |
| 151 | P08122 | Collagen alpha-2(IV) chain OS=Mus musculus GN=Col4a2 PE=1 SV=4                                            | GN=Col4a2   | 2.23 |
| 152 | Q8K3V4 | Protein-arginine deiminase type-6 OS=Mus musculus GN=Padf6 PE=1 SV=2                                      | GN=Padf6    | 2.23 |
| 153 | Q9JK53 | Prolargin OS=Mus musculus GN=Prelp PE=1 SV=2                                                              | GN=Prelp    | 2.23 |
| 154 | Q6NSP9 | High mobility group protein HMGI-C OS=Mus musculus GN=Hmga2 PE=1 SV=1                                     | GN=Hmga2    | 2.25 |
| 155 | Q8JZU2 | Tricarboxylate transport protein, mitochondrial OS=Mus musculus GN=Slc25a1 PE=1 SV=1                      | GN=Slc25a1  | 2.25 |
| 156 | P97927 | Laminin subunit alpha-4 OS=Mus musculus GN=Lama4 PE=1 SV=2                                                | GN=Lama4    | 2.25 |
| 157 | O88322 | Nidogen-2 OS=Mus musculus GN=Nid2 PE=1 SV=2                                                               | GN=Nid2     | 2.25 |
| 158 | O70423 | Membrane primary amine oxidase OS=Mus musculus GN=Aoc3 PE=1 SV=3                                          | GN=Aoc3     | 2.27 |
| 159 | Q9Z0F7 | Gamma-synuclein OS=Mus musculus GN=Sneg PE=1 SV=1                                                         | GN=Sneg     | 2.27 |
| 160 | Q61738 | Integrin alpha-7 OS=Mus musculus GN=Itga7 PE=1 SV=3                                                       | GN=Itga7    | 2.28 |
| 161 | P50285 | Dimethylaniline monooxygenase [N-oxide-forming] 1 OS=Mus musculus GN=Fmo1 PE=1 SV=1                       | GN=Fmo1     | 2.30 |
| 162 | Q9EQ20 | Methylmalonate-semialdehyde dehydrogenase [acylating], mitochondrial OS=Mus musculus GN=Aldh6a1 PE=1 SV=1 | GN=Aldh6a1  | 2.31 |
| 163 | B7ZNH7 | Collagen alpha-1(XIV) chain OS=Mus musculus GN=Col14a1 PE=1 SV=1                                          | GN=Col14a1  | 2.32 |
| 164 | P09528 | Ferritin heavy chain OS=Mus musculus GN=Fth1 PE=1 SV=2                                                    | GN=Fth1     | 2.33 |
| 165 | P16045 | Galectin-1 OS=Mus musculus GN=Lgals1 PE=1 SV=3                                                            | GN=Lgals1   | 2.34 |
| 166 | P24270 | Catalase OS=Mus musculus GN=Cat PE=1 SV=4                                                                 | GN=Cat      | 2.40 |
| 167 | Q61554 | Fibrillin-1 OS=Mus musculus GN=Fbn1 PE=1 SV=2                                                             | GN=Fbn1     | 2.41 |
| 168 | P47738 | Aldehyde dehydrogenase, mitochondrial OS=Mus musculus GN=Aldh2 PE=1 SV=1                                  | GN=Aldh2    | 2.42 |
| 169 | Q91W19 | Sulfotransferase OS=Mus musculus GN=Sult1a1 PE=1 SV=1                                                     | GN=Sult1a1  | 2.44 |
| 170 | Q9CWU5 | KH domain-containing protein 3 OS=Mus musculus GN=Khdc3 PE=1 SV=1                                         | GN=Khdc3    | 2.45 |
| 171 | Q9CPX4 | Ferritin OS=Mus musculus GN=Ftl1-ps1 PE=1 SV=1                                                            | GN=Ftl1-ps1 | 2.48 |
| 172 | P28654 | Decorin OS=Mus musculus GN=Den PE=1 SV=1                                                                  | GN=Den      | 2.51 |
| 173 | Q8C6K9 | Collagen alpha-6(VI) chain OS=Mus musculus GN=Col6a6 PE=1 SV=2                                            | GN=Col6a6   | 2.54 |
| 174 | Q8C253 | Galectin OS=Mus musculus GN=Lgals3 PE=1 SV=1                                                              | GN=Lgals3   | 2.54 |
| 175 | Q3THW5 | Histone H2A.V OS=Mus musculus GN=H2afv PE=1 SV=3                                                          | GN=H2afv    | 2.63 |
| 176 | P07356 | Annexin A2 OS=Mus musculus GN=Anxa2 PE=1 SV=2                                                             | GN=Anxa2    | 2.64 |

|     |        |                                                                                       |            |      |
|-----|--------|---------------------------------------------------------------------------------------|------------|------|
| 177 | E9Q4M2 | Hormone-sensitive lipase OS=Mus musculus GN=Lipe PE=1 SV=1                            | GN=Lipe    | 2.66 |
| 178 | Q6IFX2 | Keratin, type I cytoskeletal 42 OS=Mus musculus GN=Krt42 PE=1 SV=1                    | GN=Krt42   | 2.67 |
| 179 | O54724 | Polymerase I and transcript release factor OS=Mus musculus GN=Ptrf PE=1 SV=1          | GN=Ptrf    | 2.67 |
| 180 | Q8BJ64 | Choline dehydrogenase, mitochondrial OS=Mus musculus GN=Chdh PE=1 SV=1                | GN=Chdh    | 2.68 |
| 181 | P29788 | Vitronectin OS=Mus musculus GN=Vtn PE=1 SV=2                                          | GN=Vtn     | 2.70 |
| 182 | Q9WVC3 | Caveolin-2 OS=Mus musculus GN=Cav2 PE=1 SV=1                                          | GN=Cav2    | 2.71 |
| 183 | Q60714 | Long-chain fatty acid transport protein 1 OS=Mus musculus GN=Slc27a1 PE=1 SV=1        | GN=Slc27a1 | 2.72 |
| 184 | Q8VCT4 | Carboxylesterase 1D OS=Mus musculus GN=Ces1d PE=1 SV=1                                | GN=Ces1d   | 2.73 |
| 185 | Q04857 | Collagen alpha-1(VI) chain OS=Mus musculus GN=Col6a1 PE=1 SV=1                        | GN=Col6a1  | 2.75 |
| 186 | P37804 | Transgelin OS=Mus musculus GN=Tagln PE=1 SV=3                                         | GN=Tagln   | 2.78 |
| 187 | E9QNU1 | NAD(P)(+)-arginine ADP-ribosyltransferase OS=Mus musculus GN=Art3 PE=1 SV=1           | GN=Art3    | 2.82 |
| 188 | Q60994 | Adiponectin OS=Mus musculus GN=Adipoq PE=1 SV=2                                       | GN=Adipoq  | 2.88 |
| 189 | P47934 | Carnitine O-acetyltransferase OS=Mus musculus GN=Crat PE=1 SV=3                       | GN=Crat    | 3.00 |
| 190 | Q91WU0 | Carboxylesterase 1F OS=Mus musculus GN=Ces1f PE=1 SV=1                                | GN=Ces1f   | 3.01 |
| 191 | P20239 | Zona pellucida sperm-binding protein 2 OS=Mus musculus GN=Zp2 PE=1 SV=1               | GN=Zp2     | 3.01 |
| 192 | E0CXN5 | Glycerol-3-phosphate dehydrogenase [NAD(+)] OS=Mus musculus GN=Gpd1 PE=1 SV=1         | GN=Gpd1    | 3.07 |
| 193 | Q3UXL1 | Protein Akr1c1 OS=Mus musculus GN=Akr1c1 PE=1 SV=1                                    | GN=Akr1c1  | 3.08 |
| 194 | Q05421 | Cytochrome P450 2E1 OS=Mus musculus GN=Cyp2e1 PE=1 SV=1                               | GN=Cyp2e1  | 3.09 |
| 195 | Q9DBL9 | 1-acylglycerol-3-phosphate O-acyltransferase ABHD5 OS=Mus musculus GN=Abhd5 PE=1 SV=1 | GN=Abhd5   | 3.24 |
| 196 | P15105 | Glutamine synthetase OS=Mus musculus GN=Glul PE=1 SV=6                                | GN=Glul    | 3.27 |
| 197 | Q63918 | Serum deprivation-response protein OS=Mus musculus GN=Sdpr PE=1 SV=3                  | GN=Sdpr    | 3.36 |
| 198 | P08228 | Superoxide dismutase [Cu-Zn] OS=Mus musculus GN=Sod1 PE=1 SV=2                        | GN=Sod1    | 3.41 |
| 199 | P40142 | Transketolase OS=Mus musculus GN=Tkt PE=1 SV=1                                        | GN=Tkt     | 3.43 |
| 200 | Q91VB8 | Alpha globin 1 OS=Mus musculus GN=Hba-a2 PE=1 SV=1                                    | GN=Hba-a2  | 3.51 |
| 201 | Q8BH64 | EH domain-containing protein 2 OS=Mus musculus GN=Ehd2 PE=1 SV=1                      | GN=Ehd2    | 3.51 |
| 202 | P30115 | Glutathione S-transferase A3 OS=Mus musculus GN=Gsta3 PE=1 SV=2                       | GN=Gsta3   | 3.52 |
| 203 | Q3TEA8 | Heterochromatin protein 1-binding protein 3 OS=Mus musculus GN=Hp1bp3 PE=1 SV=1       | GN=Hp1bp3  | 3.58 |
| 204 | D3Z041 | Long-chain-fatty-acid--CoA ligase 1 OS=Mus musculus GN=Acs11 PE=1 SV=1                | GN=Acs11   | 3.66 |
| 205 | P51885 | Lumican OS=Mus musculus GN=Lum PE=1 SV=2                                              | GN=Lum     | 4.45 |
| 206 | O88492 | Perilipin-4 OS=Mus musculus GN=Plin4 PE=1 SV=2                                        | GN=Plin4   | 4.46 |
| 207 | P49817 | Caveolin-1 OS=Mus musculus GN=Cav1 PE=1 SV=1                                          | GN=Cav1    | 4.92 |
| 208 | Q08857 | Platelet glycoprotein 4 OS=Mus musculus GN=Cd36 PE=1 SV=2                             | GN=Cd36    | 4.94 |
| 209 | P10761 | Zona pellucida sperm-binding protein 3 OS=Mus musculus GN=Zp3 PE=1 SV=4               | GN=Zp3     | 5.24 |



|     |        |                                                                                          |           |       |
|-----|--------|------------------------------------------------------------------------------------------|-----------|-------|
| 210 | P82198 | Transforming growth factor-beta-induced protein ig-h3 OS=Mus musculus GN=Tgfb1 PE=1 SV=1 | GN=Tgfb1  | 6.12  |
| 211 | Q02788 | Collagen alpha-2(VI) chain OS=Mus musculus GN=Col6a2 PE=1 SV=3                           | GN=Col6a2 | 7.21  |
| 212 | P16015 | Carbonic anhydrase 3 OS=Mus musculus GN=Ca3 PE=1 SV=3                                    | GN=Ca3    | 14.88 |
| 213 | P04117 | Fatty acid-binding protein, adipocyte OS=Mus musculus GN=Fabp4 PE=1 SV=3                 | GN=Fabp4  | 14.90 |
| 214 | F7A0B0 | Myelin basic protein (Fragment) OS=Mus musculus GN=Mbp PE=1 SV=1                         | GN=Mbp    | 16.62 |
